# Supplementary material
Source: MDPI journal article supplement (https://www.mdpi.com/2077-1312/9/7/751)
Supplement: s1 [file s1 › jmse-1273675-supplementary.pdf]

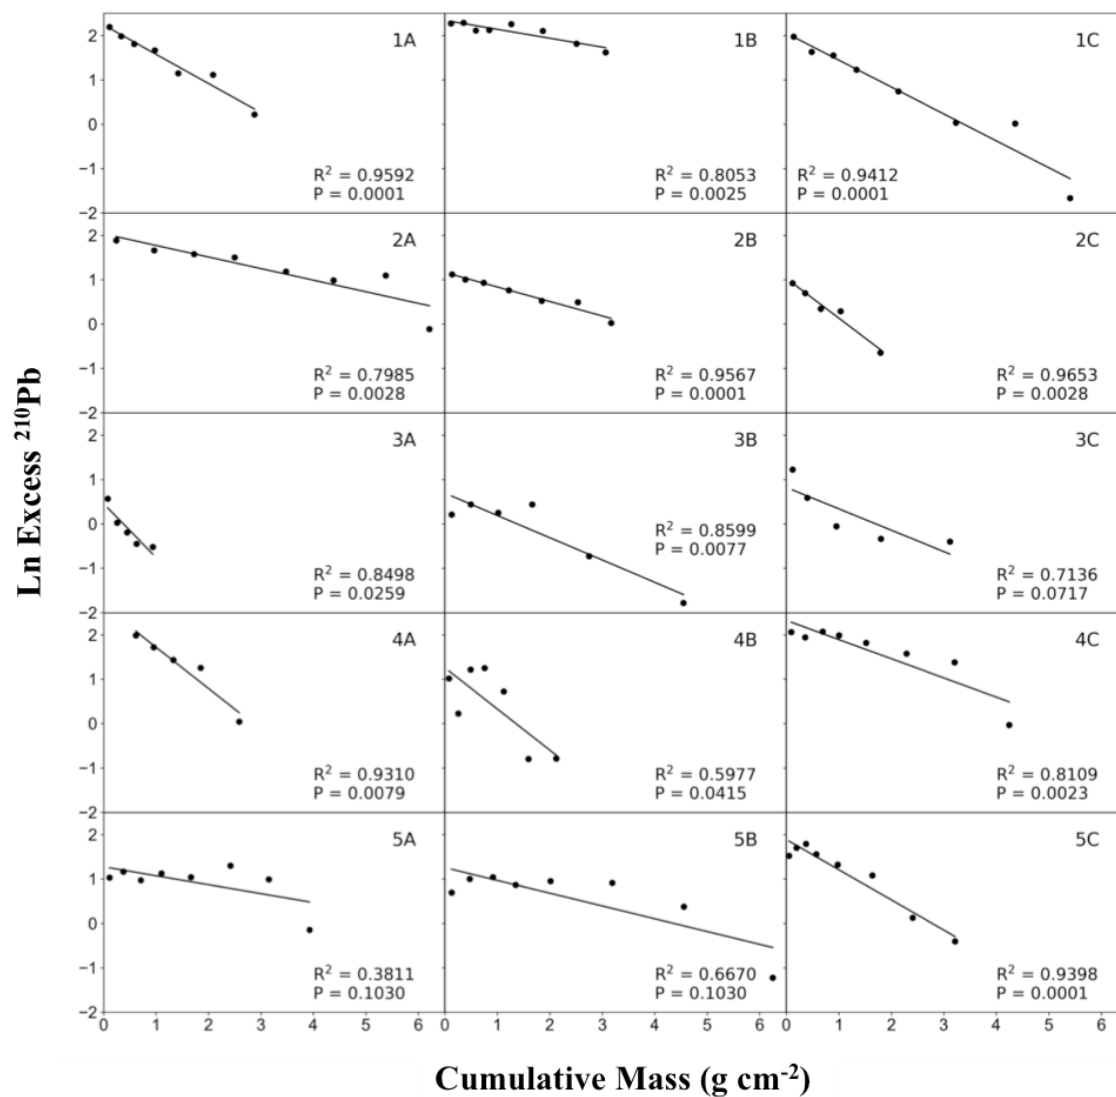

**Figure S1.** Linear regression of the natural log of unsupported  $^{210}\text{Pb}$  versus cumulative mass ( $\text{g cm}^{-2}$ ) for each subsite along the Nanticoke River.
